# Supplementary material for: Uniaxial tensile strain impact on 1T-NbS2 monolayers as cathode material for lithium–sulfur batteries
Source: Royal Society of Chemistry journal article supplement (doi:10.1039/d4cp03156c), 2024-01-01
Supplement: d4cp03156c1.pdf [file d4cp03156c1.pdf]

## Uniaxial Tensile Strain effect on 1T-NbS<sub>2</sub> Monolayers as a Potential Cathode Material for Lithium-Sulfur Batteries

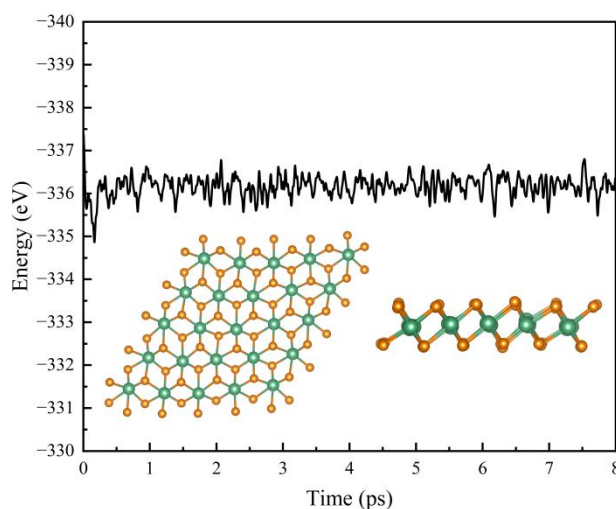

**Fig S1.** AIMD simulations of the strained 1T-NbS<sub>2</sub> monolayers for 8 ps under 300K. The insets are the top and side views of the final structure.

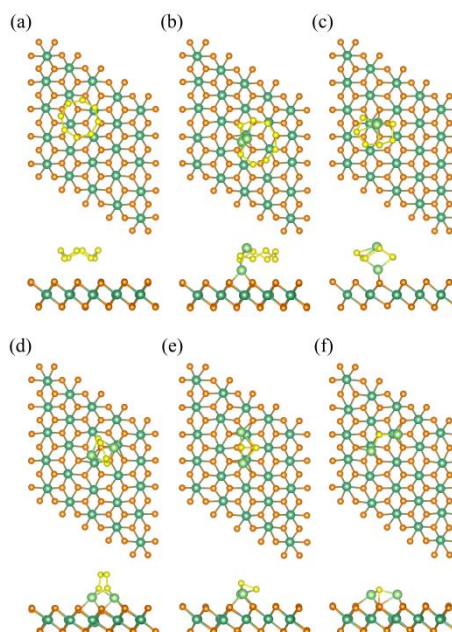

**Fig S2.** The panels (a) to (f) show the most stable adsorption configurations of S<sub>8</sub>/Li<sub>2</sub>S<sub>n</sub> on the pristine 1T-NbS<sub>2</sub> monolayer surface, corresponding to n = 8, 6, 4, 2, and 1 respectively. In these figures, orange and dark green spheres represent S and Nb atoms in the 1T-NbS<sub>2</sub> monolayer while yellow and light green spheres represent S and Li atoms in S<sub>8</sub>/Li<sub>2</sub>S<sub>n</sub>.

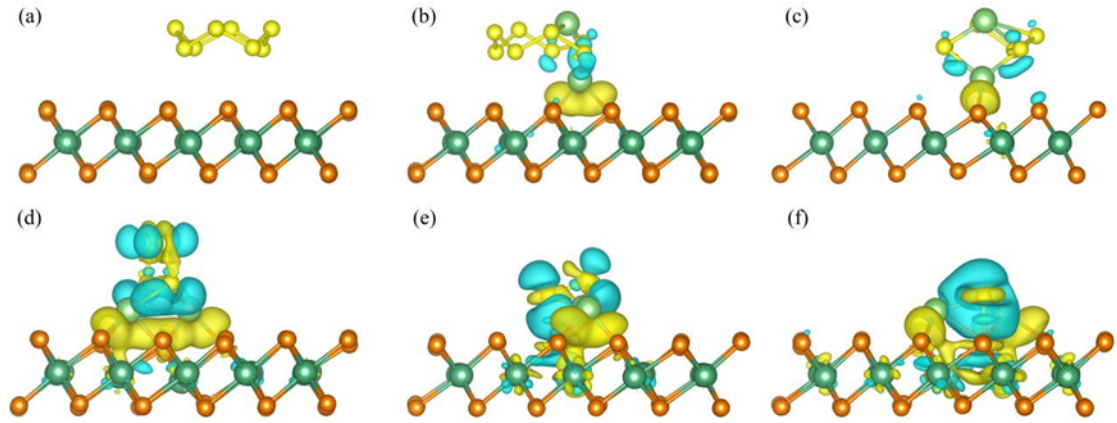

**Fig S3.** The charge density of  $S_8/Li_2S_n$  clusters on the pristine 1T-NbS<sub>2</sub> monolayer changes. (a) to (f) represent  $S_8$  and  $Li_2S_n$  ( $n=8,6,4,2,1$ ), respectively. Yellow areas indicate charge accumulation while blue areas indicate charge depletion. The isosurface threshold is set at  $0.002e/A^3$ .

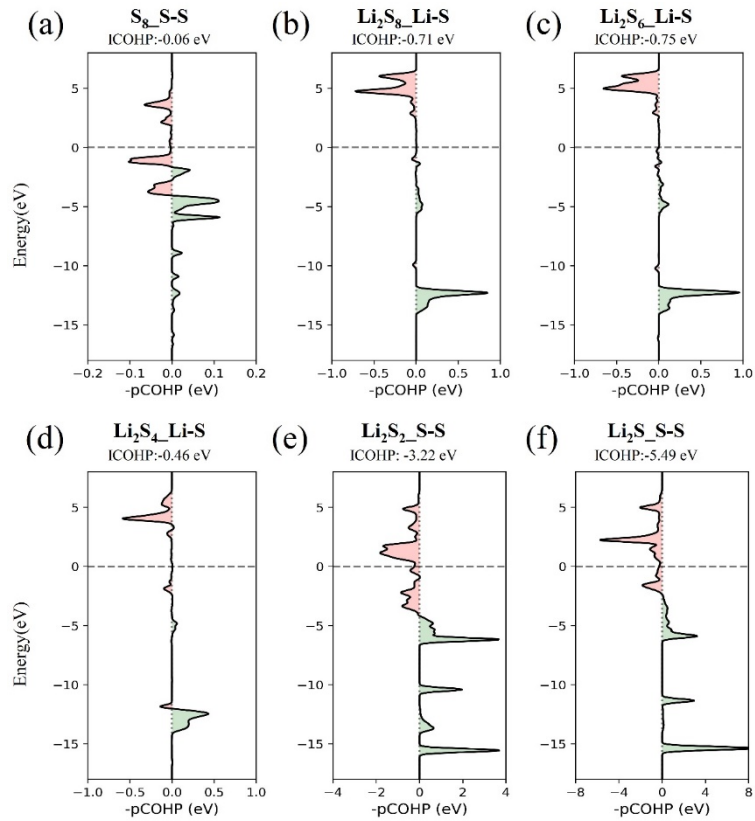

**Fig S4.** (a) ~ (f) COHP diagram of the shortest two atoms between  $S_8/Li_2S_n$  ( $n=8,6,4,2,1$ ) and the pristine 1T-NbS<sub>2</sub> monolayer surface. The bonding states are depicted in green, and the antibonding states are in red.

|                    |               | S <sub>8</sub> | Li <sub>2</sub> S <sub>8</sub> | Li <sub>2</sub> S <sub>6</sub> | Li <sub>2</sub> S <sub>4</sub> | Li <sub>2</sub> S <sub>2</sub> | Li <sub>2</sub> S |
|--------------------|---------------|----------------|--------------------------------|--------------------------------|--------------------------------|--------------------------------|-------------------|
| <i>Pristine</i>    | $d_{min}$ (Å) | 3.49906        | 2.48177                        | 2.45467                        | 2.46000                        | 2.25796                        | 2.07258           |
| <i>Post strain</i> | $d_{min}$ (Å) | 3.53448        | 2.45963                        | 2.49937                        | 2.41671                        | 2.23797                        | 2.06947           |

**Table S1.** The shortest atom distance ( $d_{min}$ ) between S<sub>8</sub>/Li<sub>2</sub>S<sub>n</sub> (n= 8, 6, 4, 2, 1) cluster and substrate on the surface of the pristine and strained 1T-NbS<sub>2</sub> monolayer.

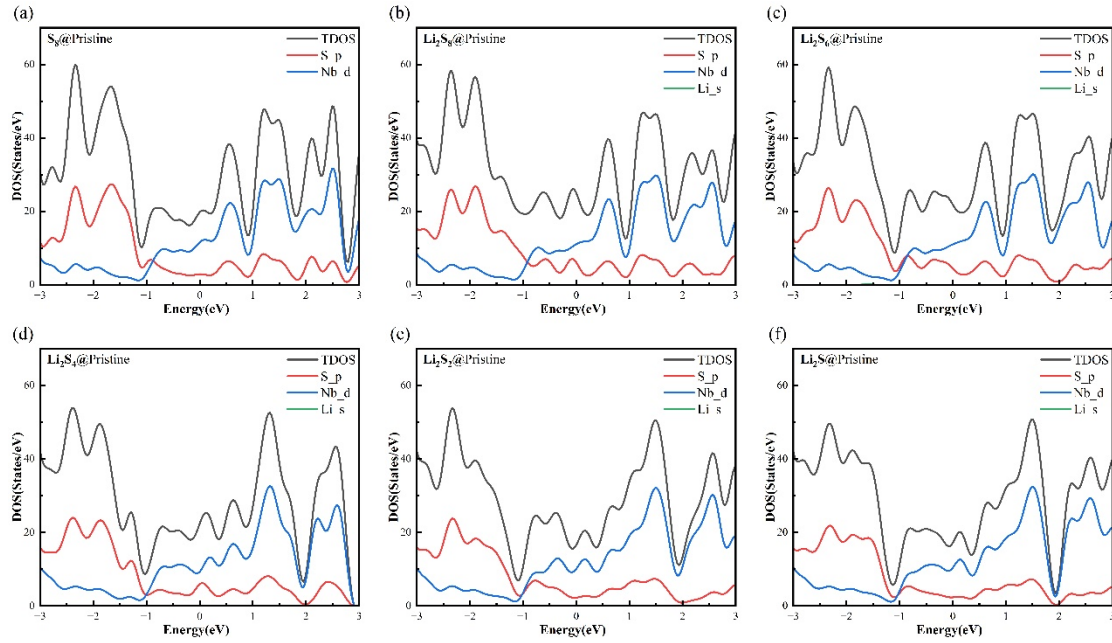

**Fig S5.** (a) ~ (f) The projected density of states (PDOS) of S<sub>8</sub>/Li<sub>2</sub>S<sub>n</sub> (n= 8, 6, 4, 2, 1) adsorbed to the pristine 1T-NbS<sub>2</sub> monolayer surface.

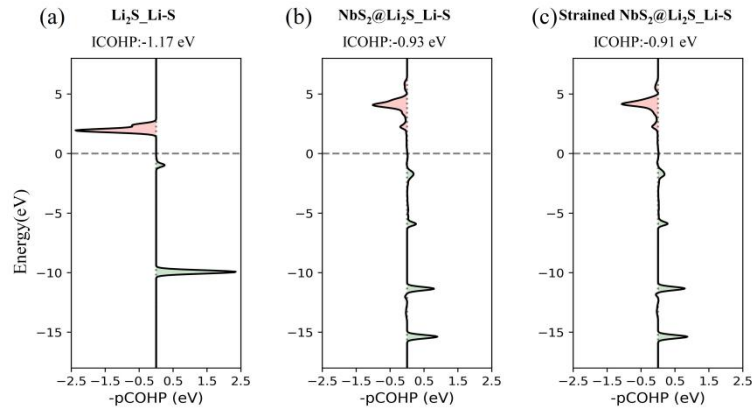

**Fig S6.** (a) ~ (c) COHP diagram of isolated Li<sub>2</sub>S, Li<sub>2</sub>S adsorbed on the pristine 1T-NbS<sub>2</sub> monolayer surface and the strained 1T-NbS<sub>2</sub> monolayer surface. The bonding states are depicted in green, and the antibonding states are in red.
